# Supplementary material for: Chromium-assisted immobilization of N-isopropylacrylamide-based methacrylic acid copolymers on collagen and leather surfaces: thermo-responsive behaviour
Source: Royal Society of Chemistry journal article supplement (doi:10.1039/c3ra41022f), 2013-01-01
Supplement: c3ra41022f.pdf [file c3ra41022f.pdf]

## Electronic Supporting Information

### Chromium-assisted Immobilization of N-isopropylacrylamide-based Methacrylic acid Copolymers to Collagen and Leather Surfaces: the Thermo-responsive Behaviour

Debasis Samanta,<sup>\*a</sup> Adhigan Murali,<sup>a</sup> Jaya Prakash A,<sup>c</sup> Pentela Nagaraju,<sup>a</sup> Ramakrishnan  
Ramesh,<sup>c</sup> Tapas Mitra,<sup>d</sup> Arumugam Gnanamani,<sup>d</sup> Sellamuthu Nagappan Jaisankar,<sup>\*a</sup>  
Ranganathan Mohan,<sup>e</sup> Md. Sayem Alam,<sup>f</sup> Asit Baran Mandal<sup>\*a,b</sup>

<sup>a</sup> Polymer Division, <sup>b</sup>Chemical Laboratory, <sup>c</sup>Leather processing, <sup>d</sup>Microbiology department, <sup>e</sup>Shoe Design and  
Development Centre, <sup>f</sup>Industrial Laboratory, Council of Scientific and Industrial Research (CSIR)-Central Leather  
Research Institute (CLRI), Adyar, Chennai-600020, India.

Tel: 91 -44 24422059; Fax: 91-44-24912150;

E-mail: abmandal@clri.res.in, abmandal@hotmail.com, debasis@clri.res.in

## Characterization of NIPAM-co-Methacrylic acid polymer by spectroscopic study

Success of the polymerization reaction was confirmed by spectroscopic study such as  $^1\text{H}$  NMR and FTIR spectra. Fig. 1 (A) presents the  $^1\text{H}$  NMR spectrum after polymerization of NIPAM and methacrylic acid. Fig. (B) presents the  $^1\text{H}$  NMR of NIPAM monomer. After the polymerization reaction, the peak for olefin proton at 5.5 ppm and 6 ppm disappeared and characteristic new broad peaks for aliphatic protons of the polymer appeared at 1.4 – 2.2 ppm. In FTIR spectra (Fig. – inset), the peak for carboxylate and amide groups of the polymer appeared at 1734 and 1637  $\text{cm}^{-1}$  respectively.

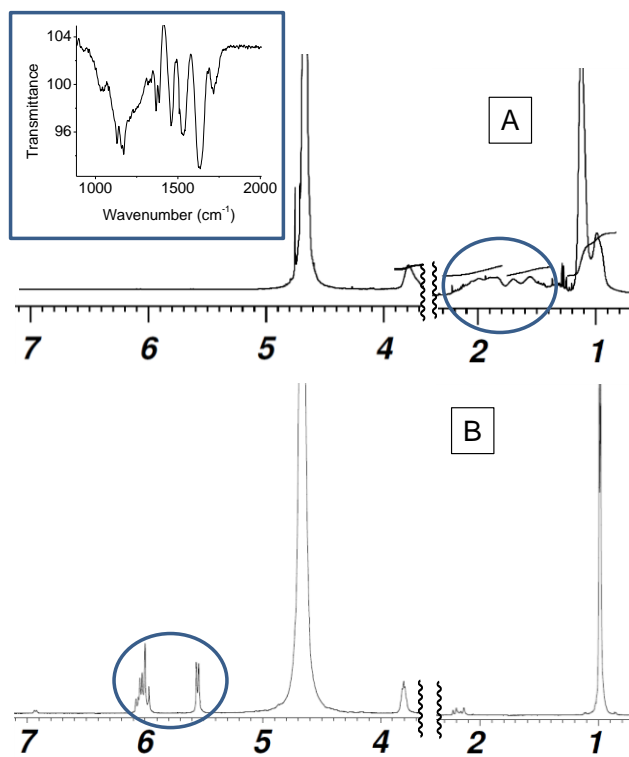

**Fig.S 1.** (A)  $^1\text{H}$  NMR spectrum after polymerization of NIPAM and methacrylic acid, (B)  $^1\text{H}$  NMR spectrum of NIPAM monomer. Inset: FTIR spectrum of NIPAM-co-methacrylic acid polymer.
